# Supplementary material
Source: PubMed Central journal article supplement (PMC7535904)
Supplement: supp_RA120.013898_160186_2_supp_569863_qf3l3m.pdf [file supp_RA120.013898_160186_2_supp_569863_qf3l3m.pdf]

## SUPPORTING INFORMATION

### Extended interaction networks with HCV protease NS3-4A substrates explain the lack of adaptive capability against protease inhibitors

Georg Dultz,<sup>1§</sup> Tetsuro Shimakami,<sup>2§</sup> Markus Schneider,<sup>3</sup> Kazuhisa Murai,<sup>2</sup> Daisuke Yamane,<sup>4</sup> Antoine Marion,<sup>3</sup> Tobias M. Zeitler,<sup>3</sup> Claudia Stross,<sup>1</sup> Christian Grimm,<sup>1</sup> Rebecca M. Richter,<sup>1</sup> Katrin Bäumer,<sup>1</sup> MinKyung Yi,<sup>5</sup> Ricardo M. Biondi,<sup>1,6</sup> Stefan Zeuzem,<sup>1,7</sup> Robert Tampé,<sup>8</sup> Iris Antes,<sup>3</sup> Christian M. Lange,<sup>1\*</sup> Christoph Welsch,<sup>1,7#</sup>

### SUPPLEMENTARY FIGURES

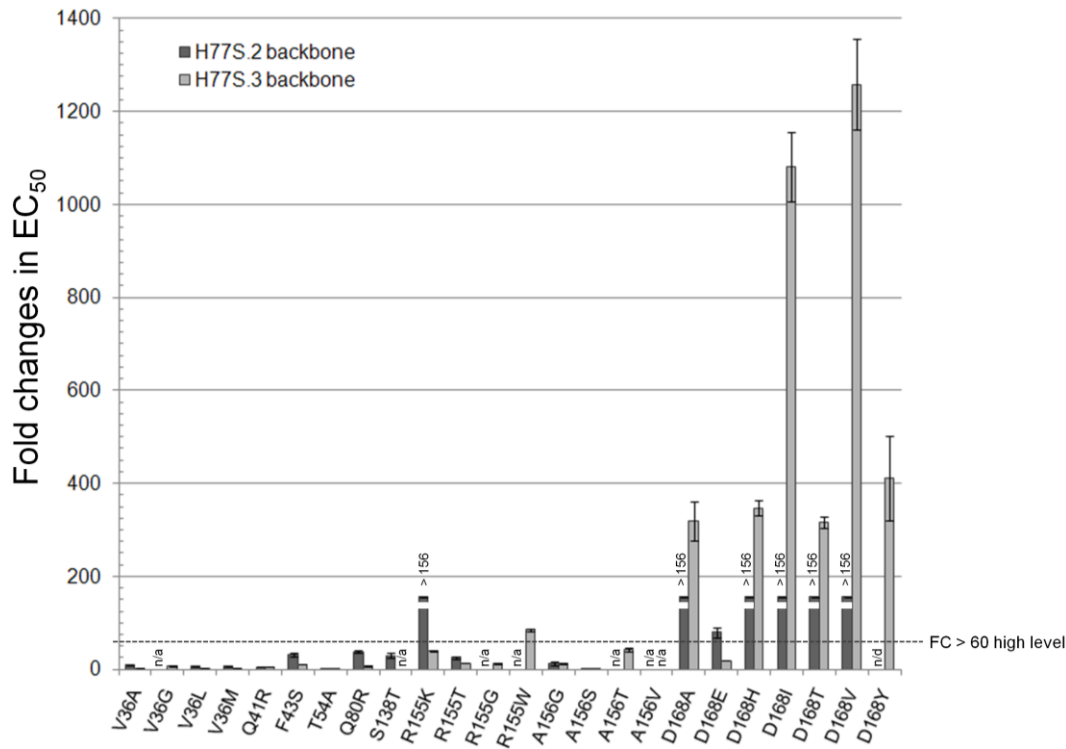

**Figure S1.**

**Resistance level of simeprevir for PI-resistant variants.** Resistance level expressed as fold change (FC) in  $EC_{50}$  values relative to H77S.2 (NS3-Q41R backbone) and H77S.3 (NS3-Q41 backbone). Data shown represent the mean  $\pm$  S.D. from at least three independent experiments. n/a: not available; n/d: not done.

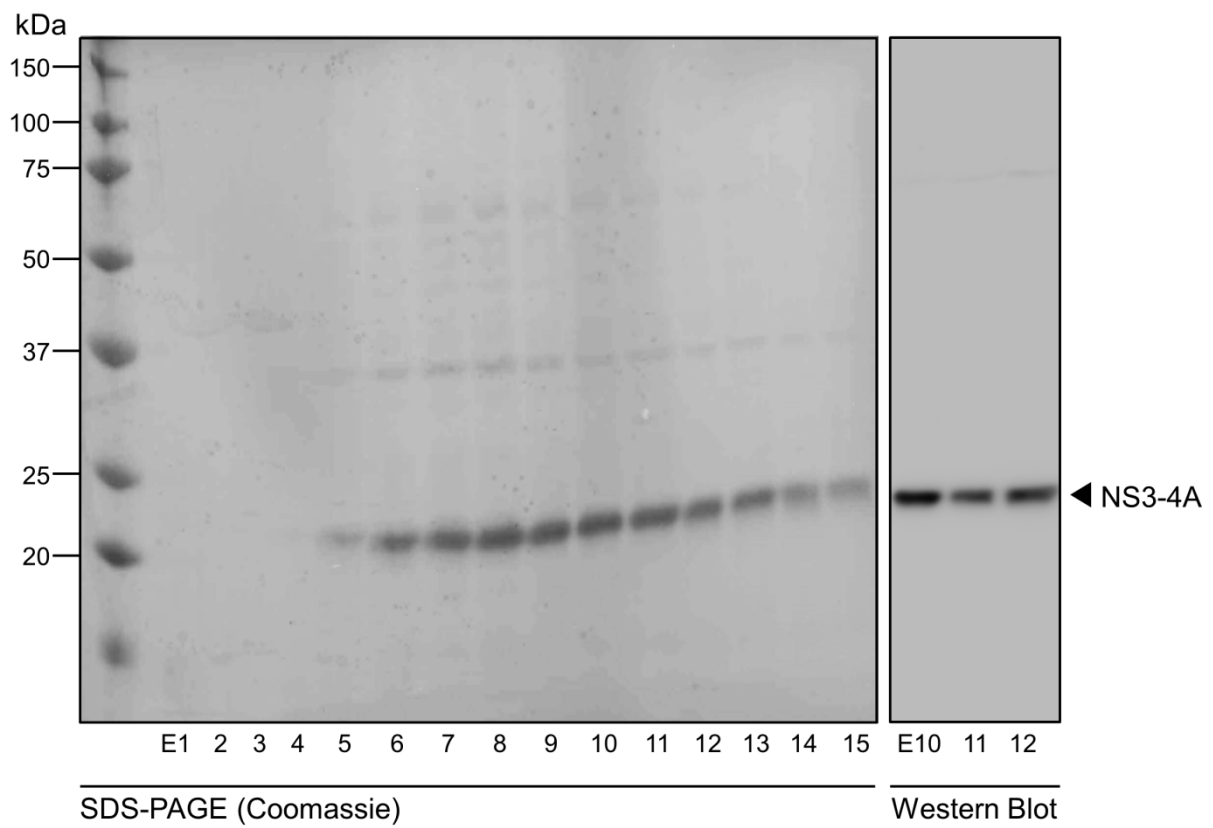

**Figure S2.**

**Expression of purified NS3-4A protease.** Purification results of the NS3-4A protease proteolytic domain expressed in Rosetta pLysS cells, purified by Ni-NTA agarose affinity chromatography (Coomassie stained SDS-PAGE). Length standard in line 1 and eluted fractions from the Ni-NTA in line E1 to E15; purified product identified by anti-NS3 Western blot in line E10 to E12.

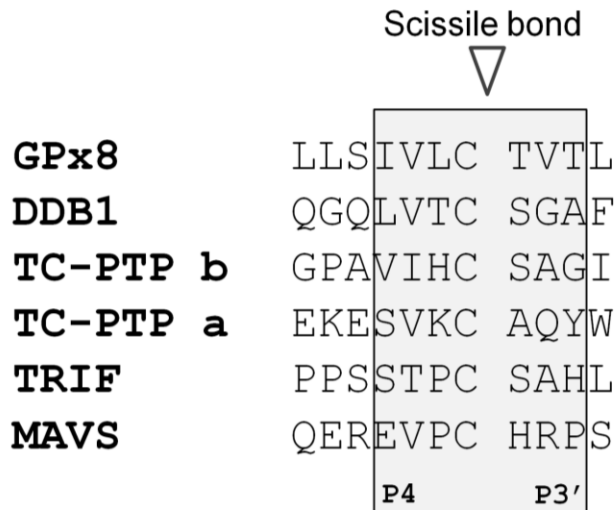

**Figure S3.**

**Cellular targets of the NS3-4A protease.** Alignment of NS3-4A cleavage sites within two adaptor proteins in viral RNA sensing and innate immunity, MAVS and TRIF, a membrane-associated glutathione peroxidase (GPx8), the E3 ubiquitin ligase component UV-damaged DNA-binding protein 1 (DDB1) and the T-cell protein tyrosine phosphatase (TC-PTP), cleavage site *a* and *b* (52-55). Residues surrounding a cleavage site are designated from the amino- to carboxyl-terminus, that is, P7-P1 and P1'-P4', with the scissile bond between P1 and P1' (51).

## SUPPLEMENTARY REFERENCES

52. Li, K., Foy, E., Ferreon, J.C., Nakamura, M., Ferreon, A.C., Ikeda, M., Ray, S.C., Gale, M Jr, and Lemon, S.M. (2005) Immune evasion by hepatitis C virus NS3/4A protease-mediated cleavage of the Toll-like receptor 3 adaptor protein TRIF. Version 2. *Proc Natl Acad Sci U S A.* **102**, 2992-2997.
53. Brenndörfer, E.D., Karthe, J., Frelin, L., Cebula, P., Erhardt, A., Schulte am Esch, J., Hengel, H., Bartenschlager, R., Sällberg, M., Häussinger, D., and Bode, J.G. (2009) Nonstructural 3/4A protease of hepatitis C virus activates epithelial growth factor-induced signal transduction by cleavage of the T-cell protein tyrosine phosphatase. *Hepatology.* **49**, 1810-1820.
54. Morikawa, K., Gouttenoire, J., Hernandez, C., Dao Thi, V.L., Tran, H.T., Lange, C.M., Dill, M.T., Heim, M.H., Donzé, O., Penin, F., Quadroni, M., and Moradpour, D. (2014) Quantitative proteomics identifies the membrane-associated peroxidase GPx8 as a cellular substrate of the hepatitis C virus NS3-4A protease. *Hepatology.* **59**, 423-433.
55. Kang, X., Chen, X., He, Y., Guo, D., Guo, L., Zhong, J., and Shu, H.B. (2013) DDB1 is a cellular substrate of NS3/4A protease and required for hepatitis C virus replication. *Virology.* **435**, 385-394.
